# Supplementary material for: Co-colonization of blaCTX-M and mcr-1 in Avian Pathogenic Escherichia coli in Southern Xinjiang: Current Status and Antimicrobial Resistance Characteristics
Source: Research Square preprint supplement (doi:10.21203/rs.3.rs-8591920/v1), 2026-01-27
Supplement: Supplementary file 1 [file 61193452b1840f6e0349557e.xlsx]

## Sheet: table 1
	Gene Name	primer sequence	Annealing temperature (℃)	Fragment size (bp)	Reference
E. coli-specific genes	phoA	F: CGATTCTGGAAATGGCAAAAG	55	720	https://doi.org/10.1016/j.mimet.2011.07.007
phylogenetic group		R: CGTGATCAGCGGTGACTATGAC
	chuA	F: GACGAACCAACGGTCAGGAT	59	279	https://doi.org/10.1128/aem.66.10.4555-4558.2000
		R: TGCCGCCAGTACCAAAGACA
	yjaA	F: TGAAGTGTCAGGAGACGCTG	59	211
		R: ATGGAGAATGCGTTCCTCAAC
	TspE4.C2	F: GAGTAATGTCGGGGCATTCA	59	152
		R: CGCGCCAACAAAGTATTACG
drug-resistance gene	blaTEM	F: GAGTATTCAACATTTCCGTGTC	57	861	https://doi.org/10.18502/ijm.v15i5.13867
		R: TAATCAGTGAGGCACCTATCTC
	blaCTX-M	F: ATGTGCAGTACCAGTAAAGT	54	545	https://doi.org/10.3934/microbiol.2024018
		R: ACCGCGATATCGTTGGTGG
	blaSHV	F: AAGATCCACTATCGCCAGCAG	56	230	https://doi.org/ 10.5812/jjm.8（4）2015.15620
		R:ATTCAGTTCCGTTTCCCAGCGG
	blaIMP	F: GGAATAGAGTGGCTTAAYTCTC	52	232	https://doi.org/10.3389/fmicb.2023.1216008
		R:GGTTTAAYAAAACAACCACC
	blaOXA-48	F: GCGTGGTTAAGGATGAACAC	55	744	https://doi.org/10.3389/fmicb.2023.1216008
		R:CATCAAGTTCAACCCAACCG
	blaVIM	F: GATGGTGTTTGGTCGCATA	55	390	https://doi.org/10.3389/fmicb.2023.1216008
		R:CGAATGCGCAGCACCAG
	blaNDM	F: GGTTTGGCGATCTGGTTTTC	56	621	https://doi.org/10.3389/fmicb.2023.1216008
		R:CGGAATGGCTCATCACGATC
	blaKPC	F: CGTCTAGTTCTGCTGTCTCTG	52	798	https://doi.org/10.3389/fmicb.2023.1216008
		R:CTTGTCATCCTTGTTAGGCG
	blaGES	F: ATGCGCTTCATTCACGCAC	55	978	https://doi.org/10.2147/IDR.S400170
		R:CTATTTGTCCGTGCTCAGG
	mcr-1	F: CGGTCAGTCCGTTTGTTC	58	309	https://doi.org/10.3390/life13020299
		R:CTTGGTCGGTCTGTAGGG
	mcr-2	F: TGTTGCTTGTGCCGATTGGA	58	567	https://doi.org/10.3390/life13020299
		R:AGATGGTATTGTTGGTTGCTG
	tetA	F: TTGGCATTCTGCATTCACTC	55	494	https://doi.org/10.1128/aac.47.10.3290-3295.2003
		R:GTATAGCTTGCCGGAAGTCG
	tetB	F: CAGTGCTGTTGTTGTCATTAA	55	571	https://doi.org/10.1128/aac.47.10.3290-3295.2003
		R: GCTTGGAATACTGAGTGTAA
	tetM	F: ACACGCCAGGACATATGGAT	55	536	https://doi.org/10.1128/aac.47.10.3290-3295.2003
		R: ATTTCCGCAAAGTTCAGACG
	aph	F: ATGGGCTCGCGATAATGTC	50	600	https://doi.org/10.1128/AAC.48.10.3996-4001.2004
		R: CGTCCAACATCAATACAACC
	ant(3')-Ia	F: ATCTGGCTATCTTGCTGACA	49	284	https://doi.org/10.1016/j.ijantimicag.2008.10.030
		R: TATGACGGGCTGATACTGG
	sul1	F: TGGTGACGGTGTTCGGCATTC	63	789	https://doi.org/10.1128/AAC.48.10.3996-4001.2004
		R: GCGAGGGTTTCCGAGAAGGTG
	sul2	F: CGGCATCGTCAACATAACCT	66	721	https://doi.org/10.1128/AAC.48.10.3996-4001.2004
		R: TGTGCGGATGAAGTCAGCTC
	clma	F: GGCCTCGCTCTTACGTCATC	57	698	https://doi.org/10.1128/AAC.48.10.3996-4001.2004
		R: GCGACACCAATACCCACTAGC
	floR	F: TATCTCCCT GTCGTTCCAG	53	399	https://doi.org/10.1128/AAC.48.10.3996-4001.2004
		R: AGAACTCGC CGATCAATG
	gyrA	F: ATGAGCGACCCTTGCGAGAGAAAT	60	685	https://doi.org/10.18926/AMO/31836
		R: AGCCCTTCAATGCTGATGTCTTC
	gyrB	F: CCTCCCAGACCAAAGACAAACT	53	821	https://doi.org/10.18926/AMO/31836
		R: CAGCATTGCTTTCGGATAACG
	Int1	F: GGGTCAAGGATCTGGATTTCG	62	483	https://doi.org/10.1016/j.jgar.2020.03.017
		R: ACATGGGTGTAAATCATCGTC
	Int2	F: CACGGATATGCGACAAAAAGGT	62	788	https://doi.org/10.1016/j.jgar.2020.03.017
		R: GTAGCAAACGAGTGACGAAATG
	Int3	F: GCCTCCGGCAGCGACTTTCAG	62	979	https://doi.org/10.1016/j.jgar.2020.03.017
		R: ACGGATCTGCCAAACCTGACT
APEC virulence gene	iroN	F: CCTCCGACGATGATAATGACG	62	886	https://doi.org/10.3389/fvets.2024.1500355
		R: GATACCATTATGCGTAATGCC
	iss	F: CAGCAACCCGAACCACTTGATG	58	323	https://doi.org/10.1128/AEM.02634-07
		R: TTCTGCCGCTCTGGCAATGCT
	ompT	F:TCATCCCGGAAGCCTCCCTCACTACTAT	66	496	https://doi.org/10.1007/s42770-023-01023-0
		R:TAGCGTTTGCTGCACTGGCTTCTGATAC
	hlyF	F:GGCCACAGTCGTTTAGGGTGCTTACC	66	450	https://doi.org/10.1007/s42770-023-01023-0
		R:GGCGGTTTAGGCATTCCGATACTCAG
	iutA	F:GGCTGGACATCATGGGAACTGG	55	300	https://doi.org/10.3389/fvets.2020.00380
		R:CGTCGGGAACGGGTAGAATCG

## Sheet: table 2
					Plasmid
Strains	MLST	serotype	Location	Sample	Col440I	IncI2	IncX1	p0111	IncFIB(AP001918)	IncI1	IncHI2A	IncHI2	Col156	IncB/O/K/Z	IncFII(pHN7A8)	IncX4	IncFIA	IncFIC(FII)	IncQ1	IncFII(pRSB107)	Col(MG828)	IncFIB(K)	IncN	IncI2	IncFII(pCoo)	IncY	IncFII	Col8282	IncP1	IncX3	IncR	ColpVC	IncI_Gamma	IncFII(29)	IncFIA(HI1)	ColE10
EC-12	6792	H27-O81	China:Xinjiang	liver	1	1	1	1	0	0	0	0	0	0	0	0	0	0	0	0	0	0	0	0	0	0	0	0	0	0	0	0	0	0	0	0
EC-14	1196	H28-O116	China:Xinjiang	liver	0	1	0	0	1	1	0	0	0	0	0	0	0	0	0	0	0	0	0	0	0	0	0	0	0	0	0	0	0	0	0	0
EC-15	1196	H28-O116	China:Xinjiang	liver	0	1	0	1	1	0	1	1	0	0	0	0	0	0	0	0	0	0	0	0	0	0	0	0	0	0	0	0	0	0	0	0
EC-16	155	H23-O134	China:Xinjiang	liver	0	1	0	1	1	0	1	1	0	0	0	0	0	0	0	0	0	0	0	0	0	0	0	0	0	0	0	0	0	0	0	0
EC-92	162	H9-O9	China:Xinjiang	liver	0	0	0	0	1	0	0	0	0	0	0	0	0	1	0	0	0	0	0	0	0	0	0	0	0	0	0	0	0	0	0	0
GCA_001893635.1	2732	H48	China:Shandong	carcasses	0	1	1	0	1	0	0	0	1	1	1	0	0	0	0	0	0	0	0	0	0	0	0	0	0	0	0	0	0	0	0	0
GCA_001984845.2	88	H4-O9	Brazil: Sao Paulo	carcasses	0	0	0	0	1	1	0	0	0	0	0	1	0	0	0	0	0	0	0	0	0	0	0	0	0	0	0	0	0	0	0	0
GCA_001984855.2	1850	H10-O9	Brazil: Sao Paulo	carcasses	0	0	0	0	1	1	0	0	0	0	0	1	1	1	0	0	0	0	0	0	0	0	0	0	0	0	0	0	0	0	0	0
GCA_003058425.1	3941	H52-O14	Türkiye: Hatay	carcasses	0	0	0	1	1	0	0	0	0	0	0	0	1	0	1	0	0	0	0	0	0	0	0	0	0	0	0	0	0	0	0	0
GCA_003069365.1	1049	H10-O8	Türkiye: Hatay	carcasses	0	0	0	0	1	0	0	0	0	0	0	1	0	0	0	1	0	0	0	0	0	0	0	0	0	0	0	0	0	0	0	0
GCA_003686395.1	156	H28-O159	China:Zhejiang	manure	0	1	0	1	1	0	0	0	0	0	0	0	0	1	0	0	1	0	0	0	0	0	0	0	0	0	0	0	0	0	0	0
GCA_004006575.1	2705	H10-O173	China:Zhejiang	chicken	0	0	0	0	0	0	1	1	0	0	0	0	0	0	0	0	0	1	1	0	0	0	0	0	0	0	0	0	0	0	0	0
GCA_004135855.1	93	H10-O5	South Korean	carcasses	0	1	0	0	1	0	1	1	0	0	0	0	0	1	0	0	0	0	1	0	0	0	0	0	0	0	0	0	0	0	0	0
GCA_009925485.1	46	H10-O9	Tanzania: Zanzibar	carcasses	0	0	0	0	1	0	0	0	0	0	0	1	0	0	0	0	0	0	0	0	1	0	0	0	0	0	0	0	0	0	0	0
GCA_013037965.1	46	H10-O132	China:Henan	sewage	0	0	0	0	1	0	0	1	0	0	0	1	0	1	0	0	0	0	0	0	0	0	0	0	0	0	0	0	0	0	0	0
GCA_013038125.1	359	H28-O119	China:Shandong	manure	0	1	0	1	1	0	0	0	0	0	1	0	0	1	0	0	1	0	0	0	0	0	0	0	0	0	0	0	0	0	0	0
GCA_013038225.1	8917	H40-O2-O5-GP7	China:Henan	manure	0	1	0	0	1	0	0	0	0	0	1	0	1	0	0	0	0	0	0	0	0	1	0	0	0	0	0	0	0	0	0	0
GCA_013038265.1	6388	H25-O53	China:Shandong	manure	0	1	0	0	1	0	0	0	1	0	0	0	1	0	1	0	0	0	0	0	0	1	1	0	0	0	0	0	0	0	0	0
GCA_013038305.1	162	H19-O9	China:Shandong	sewage	0	1	0	1	1	0	0	0	0	0	0	0	0	1	0	0	0	0	0	0	0	0	1	0	0	0	0	0	0	0	0	0
GCA_013038325.1	156	H45-O130	China:Shandong	manure	0	1	1	1	1	0	0	0	0	0	0	0	0	1	0	0	0	0	0	0	0	0	0	0	0	0	0	0	0	0	0	0
GCA_013038365.1	617	H9-O132	China:Shandong	manure	0	1	1	0	1	0	0	0	1	0	1	0	1	1	0	0	1	0	0	0	0	1	0	0	0	0	0	0	0	0	0	0
GCA_013038685.1	93	H4-O7	China:Guangdong	manure	0	0	0	0	1	0	1	1	0	0	0	0	1	1	1	0	0	0	0	0	0	0	0	1	0	0	0	0	0	0	0	0
GCA_013038985.1	162	H19-O9	China:Guangdong	lung	0	1	0	0	1	0	0	0	1	0	0	0	0	0	0	0	1	0	0	0	0	1	0	0	0	0	0	0	0	0	0	0
GCA_013039065.1	Unknown	H4-O64	China:Shandong	liver	0	0	0	0	1	0	0	0	0	0	0	0	0	0	0	0	0	0	0	0	0	0	1	0	1	0	0	0	0	0	0	0
GCA_013039485.1	224	H23-O163	China:Shandong	manure	0	1	1	0	1	0	0	0	0	0	0	0	0	0	0	0	0	0	1	0	0	0	0	0	0	0	0	0	0	0	0	0
GCA_013039525.1	224	H23-O163	China:Shandong	manure	0	1	1	0	1	0	0	0	0	0	0	0	0	0	0	0	0	0	0	0	0	0	0	0	0	0	0	0	0	0	0	0
GCA_013039565.1	48	H5-O110	China:Shandong	manure	0	0	0	1	1	0	1	1	0	0	0	0	0	0	0	0	0	0	1	0	0	0	0	0	0	1	0	0	0	0	0	0
GCA_013039605.1	206	H5-O108	China:Shandong	manure	0	0	1	0	1	0	0	0	1	0	0	0	0	1	0	0	0	0	1	0	0	1	0	0	0	0	1	0	0	0	0	0
GCA_013039665.1	155	H51-O185	China:Shandong	manure	0	1	1	0	1	1	0	0	0	0	1	0	0	1	0	0	0	0	0	0	0	0	0	0	0	0	0	0	0	0	0	0
GCA_013039725.1	Unknown	H48-O12	China:Shandong	manure	0	1	1	0	1	0	0	0	1	0	1	0	0	1	0	0	1	0	0	0	0	0	0	0	0	0	0	1	1	0	0	0
GCA_013039765.1	206	H5	China:Shandong	manure	0	1	1	1	1	0	0	0	0	0	1	0	0	1	0	0	0	0	0	0	0	0	0	0	0	0	0	0	0	0	0	0
GCA_013039845.1	354	H34-O1	China:Shandong	lung	0	1	0	0	1	0	1	1	0	0	0	0	1	0	0	0	0	0	0	0	0	0	0	0	0	0	0	0	0	0	0	0
GCA_013039925.1	156	H28	China:Shandong	lung	0	1	0	1	0	0	1	1	0	0	1	0	0	0	0	0	0	0	0	0	0	0	0	0	0	0	0	0	0	0	0	0
GCA_013039945.1	354	H34-O1	China:Shandong	liver	0	1	0	0	1	0	1	1	0	0	0	0	1	0	0	0	0	0	0	0	0	0	0	0	0	0	0	0	0	0	0	0
GCA_013282565.1	359	H25-O100	Brazil:Paraiba	carcasses	0	0	0	0	1	0	0	0	0	0	1	1	0	0	0	0	0	0	0	0	0	1	0	0	0	0	0	0	0	1	0	0
GCA_015203615.1	212	H49-O18	Spain	chicken	0	0	0	0	0	1	1	1	0	0	0	0	0	0	1	0	0	0	0	0	0	0	0	0	0	0	0	0	0	0	0	0
GCA_016785525.1	1585	H32-O141	Laos	carcasses	0	0	0	1	0	0	0	0	0	0	0	0	0	0	0	0	0	1	0	0	0	0	0	0	1	0	0	0	0	0	1	0
GCA_016785705.1	48	H18-O8	Laos	manure	0	0	0	1	0	0	0	0	0	0	0	1	0	0	0	0	0	0	0	0	0	0	0	0	0	0	0	0	0	0	0	1
GCA_016786075.1	69	H18-O17-O77	Laos	manure	0	1	0	0	1	0	0	0	1	1	0	0	1	0	0	0	0	0	0	0	0	0	0	0	1	0	0	0	0	0	0	0
GCA_016791805.1	2505	H51-O29	Laos	carcasses	0	1	0	0	1	1	0	0	0	0	0	0	0	1	1	0	0	0	0	0	0	0	0	0	0	0	0	0	0	0	0	0
GCA_013038345.1	8909	H9-O8	China:Shandong	manure	0	1	0	0	1	0	1	1	0	0	1	0	0	1	0	0	0	0	0	0	0	0	0	0	0	0	0	0	0	0	0	0
GCA_013039405.1	648	H42-O1	China:Shandong	manure	0	1	0	0	1	0	1	1	1	0	0	0	0	1	0	0	0	0	0	0	0	0	0	0	0	0	0	0	0	0	0	0
GCA_014688885.1	117	H4	Germany	carcasses	0	0	0	0	1	1	1	1	0	0	0	0	0	1	1	0	0	0	0	0	0	0	0	0	0	0	0	0	0	0	0	0
GCA_015203475.1	648	H42-O1	Spain	chicken	0	0	0	0	1	0	1	1	0	0	0	0	0	1	0	0	1	0	0	0	0	0	0	0	0	0	0	0	0	0	0	0

## Sheet: table 3
GENE	EC-12	EC-14	EC-15	EC-16	EC-92	GCA_001893635.1	GCA_001984845.2	GCA_001984855.2	GCA_003058425.1	GCA_003069365.1	GCA_003686395.1	GCA_004006575.1	GCA_004135855.1	GCA_009925485.1	GCA_013037965.1	GCA_013038125.1	GCA_013038225.1	GCA_013038265.1	GCA_013038305.1	GCA_013038325.1	GCA_013038365.1	GCA_013038685.1	GCA_013038985.1	GCA_013039065.1	GCA_013039485.1	GCA_013039525.1	GCA_013039565.1	GCA_013039605.1	GCA_013039665.1	GCA_013039725.1	GCA_013039765.1	GCA_013039845.1	GCA_013039925.1	GCA_013039945.1	GCA_013282565.1	GCA_015203615.1	GCA_016785525.1	GCA_016785705.1	GCA_016786075.1	GCA_016791805.1	GCA_013038345.1	GCA_013039405.1	GCA_014688885.1	GCA_015203475.1
aac(3)-IId	1	1	1	0	1	0	0	0	0	0	0	0	0	0	0	0	0	1	0	0	0	1	1	0	0	0	0	0	0	1	0	0	0	0	0	0	0	1	1	0	0	0	0	0
aac(3)-IIe	0	0	0	0	0	0	0	0	0	0	0	0	0	0	0	0	0	0	0	1	0	0	0	0	0	0	0	0	0	0	0	0	0	0	0	1	0	0	0	0	0	0	0	0
aac(3)-IVa	0	0	0	1	0	0	0	0	0	0	1	1	0	0	1	1	0	0	0	0	0	1	0	0	0	0	1	0	0	0	0	1	1	1	0	0	0	0	0	0	1	1	0	0
aac(3)-VIa	0	0	0	0	0	0	1	0	0	0	0	0	0	0	0	0	0	0	0	0	0	0	0	0	0	0	0	0	0	0	0	0	0	0	0	0	0	0	0	0	0	0	0	0
aac(6')-Ib-AKT	0	0	0	0	0	0	0	0	0	0	0	0	0	0	0	0	0	0	0	0	0	0	0	0	0	0	1	0	0	0	0	0	0	0	0	0	0	0	0	0	0	0	0	0
aac(6')-Ib-D181Y	0	0	0	0	0	0	0	0	0	0	0	0	0	0	0	0	0	0	0	0	0	0	0	0	0	0	0	0	0	0	0	0	12	0	0	0	0	0	0	0	0	0	0	0
aac(6')-Il	0	0	0	0	0	0	0	0	0	0	0	0	0	0	0	0	0	0	0	0	0	0	0	0	0	0	0	0	0	1	0	0	0	0	0	0	0	0	0	0	0	0	0	0
aadA1	0	0	0	0	0	1	1	0	0	0	0	1	1	0	1	1	0	0	0	1	1	1	0	0	0	0	1	0	1	1	1	1	0	1	1	1	0	1	1	1	1	1	1	0
aadA12	0	0	0	0	0	0	0	1	0	0	0	0	0	0	0	0	0	0	0	0	0	0	0	0	0	0	0	0	0	0	0	0	0	0	0	0	0	0	0	0	0	0	0	0
aadA16	0	0	0	0	0	0	0	0	0	0	0	0	0	0	0	0	0	0	0	0	0	0	0	0	0	0	0	0	0	0	0	0	1	0	0	0	0	0	0	0	0	0	0	0
aadA2	0	1	1	0	1	1	1	0	0	0	1	1	0	0	1	0	0	1	0	1	0	1	1	1	1	1	0	1	1	1	1	1	1	1	0	1	0	1	1	0	1	1	1	1
aadA22	0	0	0	1	0	0	0	0	0	0	0	0	0	0	0	0	0	1	1	0	0	0	0	0	0	0	0	0	0	0	0	1	0	1	0	0	0	0	0	0	0	1	0	0
aadA5	1	0	0	0	0	0	0	0	1	0	1	0	0	1	0	0	1	1	0	0	0	0	0	0	0	0	1	0	0	0	0	0	0	0	0	0	0	0	0	0	0	0	0	0
ant(2'')-Ia	0	0	0	0	0	0	0	0	0	0	0	0	0	0	0	0	0	0	0	0	0	0	0	0	0	0	0	0	0	0	0	0	0	0	0	0	0	0	0	0	0	0	0	1
aph(3'')-Ib	0	1	1	1	1	1	0	0	1	0	1	1	1	1	0	1	1	1	1	0	1	1	1	0	1	1	1	1	1	1	0	1	1	1	1	1	0	1	0	1	1	1	1	0
aph(3')-IIa	1	0	0	0	0	1	0	0	0	0	0	0	0	0	0	0	0	0	0	1	1	0	0	0	1	1	0	1	1	1	1	0	0	0	1	0	0	0	0	0	0	0	0	0
aph(3')-Ia	0	0	0	1	0	1	0	1	0	0	1	1	0	0	1	1	0	1	1	1	0	1	1	1	0	0	0	0	0	0	0	1	1	1	0	0	0	0	0	0	0	1	0	0
aph(4)-Ia	0	0	0	1	0	0	0	0	0	0	1	1	0	0	1	1	0	0	0	0	0	0	0	0	0	0	1	0	0	0	0	1	1	1	0	0	0	0	0	0	1	1	0	0
aph(6)-Ic	0	0	0	0	0	0	0	0	0	0	0	0	0	0	0	0	0	0	0	0	0	0	0	0	0	0	0	0	0	0	0	0	0	0	1	0	0	0	0	0	0	0	0	0
aph(6)-Id	1	1	1	1	1	1	0	0	1	0	1	1	1	1	0	1	1	1	1	0	1	1	1	0	1	1	1	1	1	1	0	1	1	1	1	1	0	1	0	1	1	1	1	0
arr-2	0	0	0	0	0	0	0	0	0	0	0	0	1	0	0	0	0	0	0	1	1	0	0	0	0	0	1	0	1	0	1	0	0	0	0	0	0	0	0	0	0	1	0	0
arr-3	0	0	0	0	0	0	0	0	0	0	0	0	0	0	0	0	0	0	0	0	0	0	0	0	0	0	0	0	0	0	0	0	1	0	0	0	0	0	0	0	0	0	0	0
blaCMY-166	0	0	0	0	0	0	0	0	0	0	0	0	0	0	0	0	0	0	0	0	1	0	0	0	0	0	0	0	0	0	0	0	0	0	0	0	0	0	0	0	0	0	0	0
blaCMY-2	0	0	0	0	0	0	0	1	0	0	0	0	0	0	0	0	0	0	0	0	0	0	0	0	0	0	0	0	0	0	0	0	0	0	0	0	0	0	0	0	0	0	1	0
blaCTX-M-105	0	0	0	0	0	0	0	0	0	0	0	0	0	0	0	0	0	0	0	0	0	0	0	1	0	0	0	0	1	0	0	0	0	0	0	0	0	0	0	0	0	0	0	0
blaCTX-M-123	0	0	0	0	0	0	0	0	0	0	0	0	0	0	0	0	0	0	0	0	0	0	1	0	0	0	0	0	0	0	0	0	0	0	0	0	0	0	0	0	0	0	0	0
blaCTX-M-137	0	0	0	0	0	0	0	0	0	0	0	0	0	0	0	0	0	0	1	0	0	0	0	0	0	0	0	0	0	0	0	0	0	0	0	0	0	0	0	0	0	0	0	0
blaCTX-M-14	0	0	0	0	0	0	0	0	0	0	0	1	0	0	1	0	0	0	0	0	0	0	0	0	0	0	1	0	0	0	0	1	0	1	0	0	0	0	0	0	1	0	0	0
blaCTX-M-15	0	0	0	0	0	0	0	0	0	1	0	0	0	0	0	0	0	0	0	0	0	0	0	0	0	0	0	0	0	0	0	0	0	0	0	0	0	0	0	0	0	0	0	0
blaCTX-M-199	0	0	0	0	0	0	0	0	0	0	1	0	0	0	0	0	0	0	0	0	0	0	0	0	1	1	0	0	0	0	0	0	0	0	0	0	0	0	0	0	0	0	0	0
blaCTX-M-2	0	0	0	0	0	0	1	0	0	0	0	0	0	0	0	0	0	0	0	0	0	0	0	0	0	0	0	0	0	0	0	0	0	0	1	0	0	0	0	0	0	0	0	0
blaCTX-M-55	0	1	1	0	1	1	0	0	0	0	0	0	0	0	0	1	1	1	0	1	0	0	0	0	0	0	0	0	0	1	0	0	1	0	0	0	0	0	0	1	1	0	0	0
blaCTX-M-64	0	0	0	1	0	0	0	0	0	0	0	0	0	0	0	0	0	0	1	0	0	0	0	0	0	0	0	1	0	1	0	0	0	0	0	0	0	0	0	0	0	0	0	0
blaCTX-M-65	1	0	0	0	0	0	0	0	0	0	0	0	1	0	0	0	0	0	1	0	1	1	0	1	0	0	0	0	1	0	1	0	0	0	0	0	0	0	0	0	0	1	0	0
blaCTX-M-9	0	0	0	0	0	0	0	0	0	0	0	0	0	0	0	0	0	0	0	0	0	0	0	0	0	0	0	0	0	0	0	0	0	0	0	0	0	0	0	0	0	0	0	1
blaEC	0	0	0	0	0	0	0	0	0	0	0	1	0	0	1	0	0	0	0	0	0	18	0	0	0	0	0	1	0	0	1	0	0	0	0	0	1	0	0	0	0	0	1	0
blaEC-13	0	0	0	0	0	0	1	0	0	0	0	0	0	0	0	0	0	0	0	0	0	0	0	0	0	0	0	0	0	0	0	0	0	0	0	0	0	0	0	1	12	0	0	0
blaEC-15	1	0	0	0	0	0	0	0	1	0	0	0	1	1	0	0	1	0	0	0	1	0	0	0	0	0	1	0	0	0	0	0	0	0	0	0	0	1	0	0	0	0	0	0
blaEC-18	0	1	1	1	1	0	0	1	0	0	1	0	0	0	0	1	0	1	1	1	0	0	1	1	1	1	0	0	1	0	0	0	1	0	1	1	0	0	0	0	0	0	0	0
blaEC-19	0	0	0	0	0	0	0	0	0	0	0	0	0	0	0	0	0	0	0	0	0	0	0	0	0	0	0	0	0	0	0	1	0	1	0	0	0	0	0	0	0	1	0	1
blaEC-8	0	0	0	0	0	1	0	0	0	1	0	0	0	0	0	0	0	0	0	0	0	0	0	0	0	0	0	0	0	1	0	0	0	0	0	0	0	0	1	0	0	0	0	0
blaNDM-5	0	0	0	0	0	0	0	0	0	0	0	0	0	0	0	0	0	0	0	0	0	0	0	0	0	0	1	0	0	0	0	0	0	0	0	0	0	0	0	0	0	0	0	0
blaNDM-9	0	0	0	0	0	1	0	0	0	0	0	0	0	0	0	0	0	1	0	1	0	0	1	1	1	1	0	1	1	1	1	1	1	1	0	0	0	0	0	0	0	1	0	0
blaOXA-1	0	0	0	0	0	0	0	0	0	0	0	0	0	0	0	0	0	0	0	0	0	0	0	0	0	0	0	0	0	0	0	0	1	0	0	0	0	0	0	0	0	0	0	0
blaOXA-10	0	0	0	0	0	0	0	0	0	0	0	0	1	0	0	0	0	0	0	1	1	0	0	0	0	0	1	0	1	0	1	0	0	0	0	0	0	0	0	0	0	1	0	0
blaTEM-1	0	1	1	0	1	0	0	0	1	0	1	1	0	1	0	1	1	1	1	0	1	1	1	0	1	1	0	1	1	1	1	0	1	0	1	1	0	1	1	1	1	1	1	0
blaTEM-150	0	0	0	0	0	0	0	1	0	0	0	0	0	0	0	0	0	0	0	0	0	0	0	0	0	0	1	0	0	0	0	0	0	0	0	1	0	0	0	0	0	0	0	0
blaTEM-215	0	0	0	0	0	0	0	0	0	0	0	0	0	0	0	0	0	0	1	0	0	0	0	0	0	0	0	0	0	0	0	0	0	0	0	0	0	0	0	0	0	0	0	0
ble-MBL	0	0	0	0	0	1	0	0	0	0	0	0	0	0	0	0	0	1	0	1	0	0	1	1	1	1	1	1	1	1	1	1	1	1	0	0	0	0	0	0	0	1	0	0
bleO	0	0	0	1	0	0	0	0	0	0	1	1	0	0	0	0	0	0	0	0	0	1	0	0	0	0	0	0	0	0	0	0	1	0	0	0	0	0	1	0	1	0	0	0
ble_Tn5	0	0	0	0	0	0	0	0	0	0	0	0	0	0	0	0	0	0	0	0	0	0	0	0	0	0	0	0	0	0	0	0	0	0	1	0	0	0	0	0	0	0	0	0
catA1	0	0	0	0	0	0	0	0	1	0	1	0	0	0	0	0	0	1	0	0	0	0	0	0	0	0	1	0	0	0	0	0	1	0	0	0	0	0	0	0	0	0	1	0
catA2	0	0	0	0	0	1	0	0	0	0	0	0	0	0	0	0	0	0	0	0	0	0	0	0	0	0	0	0	0	0	0	0	0	0	0	0	0	0	0	0	0	0	0	0
catB3	0	0	0	0	0	0	0	0	0	0	0	0	0	0	0	0	0	0	0	0	0	0	0	0	0	0	0	0	0	0	0	0	1	0	0	0	0	0	0	0	0	0	0	0
cmlA1	0	0	0	0	0	1	0	0	0	0	0	1	0	0	1	0	0	0	0	0	0	1	0	0	0	0	0	0	0	0	0	1	0	1	0	1	0	1	1	0	1	1	1	0
cmlA5	0	0	0	0	0	0	0	0	0	0	0	0	1	0	0	0	0	0	0	1	1	0	0	0	0	0	1	0	1	0	1	0	0	0	0	0	0	0	0	0	0	1	0	0
cmlA6	0	0	0	0	0	0	0	0	0	0	0	0	0	0	0	0	0	0	0	0	0	0	0	0	0	0	0	0	0	0	0	0	0	0	0	0	0	0	0	0	0	1	0	0
dfrA1	0	0	0	0	0	0	0	0	0	0	0	1	0	0	0	0	0	0	0	0	0	0	0	1	0	0	0	0	0	1	0	0	0	0	1	1	0	0	0	1	0	0	0	0
dfrA12	0	1	1	1	1	1	0	0	0	0	1	0	0	0	1	0	0	1	0	1	0	1	1	1	1	1	0	1	1	1	1	1	1	1	0	0	0	0	1	0	1	1	0	0
dfrA14	0	0	0	0	1	0	0	0	0	0	0	0	1	0	0	1	1	0	0	1	1	0	0	0	0	0	1	0	1	0	1	0	0	0	0	0	1	0	0	0	0	1	0	0
dfrA15	0	0	0	0	0	0	0	0	0	0	0	0	0	0	0	0	0	0	0	0	0	0	0	0	0	0	0	0	0	0	0	0	0	0	0	0	0	1	0	0	0	0	0	0
dfrA17	1	0	0	0	0	0	0	0	1	0	1	0	0	1	0	0	1	1	0	0	0	0	0	0	1	1	1	1	0	0	0	0	0	0	0	0	0	0	0	0	0	0	0	0
dfrA27	0	0	0	0	0	0	0	0	0	0	0	0	0	0	0	0	0	0	0	0	0	0	0	0	0	0	0	0	0	0	0	0	1	0	0	0	0	0	0	0	0	0	0	0
erm(42)	0	0	0	0	0	0	0	0	0	0	0	0	0	0	0	0	0	1	0	0	0	0	0	0	0	0	0	0	0	0	0	0	0	0	0	0	0	0	0	0	0	0	0	0
erm(B)	0	0	0	0	0	0	0	0	0	0	0	0	0	0	0	1	0	0	16	0	1	0	0	0	0	0	0	0	0	0	0	1	16	1	0	0	0	0	0	0	1	0	0	0
floR	1	1	1	0	1	1	0	0	0	0	1	1	1	0	1	1	0	1	1	0	1	1	1	0	1	1	1	1	1	1	0	1	1	1	0	0	0	0	1	1	1	1	0	0
fosA3	1	0	0	1	1	1	0	0	0	0	1	1	0	0	1	1	1	1	1	1	1	0	1	1	1	1	1	1	1	1	1	1	1	1	0	0	0	0	0	0	1	1	0	0
lnu(A)	0	0	0	0	0	0	0	1	0	0	0	0	0	0	0	0	0	0	0	0	0	0	0	0	0	0	0	0	0	0	0	0	0	0	0	0	0	0	0	0	0	0	0	0
lnu(F)	0	0	0	1	0	0	0	0	0	0	0	0	0	0	1	0	0	0	0	0	0	0	0	0	0	0	0	0	0	0	0	0	0	0	0	0	0	0	0	0	0	1	0	0
mcr-1.1	1	1	1	1	1	1	1	1	1	1	1	1	1	1	1	1	1	1	1	1	1	1	1	1	1	1	1	1	1	1	1	1	1	1	1	1	1	1	1	1	1	1	1	1
mcr-9.1	0	0	0	0	0	0	0	0	0	0	0	0	0	0	0	0	0	0	0	0	0	0	0	0	0	0	0	0	0	0	0	0	0	0	0	0	0	0	0	0	0	0	0	1
mef(B)	0	0	0	0	0	0	0	0	0	0	0	0	0	0	1	0	0	0	0	0	0	0	0	0	0	0	0	0	0	0	0	0	0	0	0	0	0	0	0	0	0	0	0	0
mph(A)	1	1	1	1	1	1	0	0	1	0	1	1	1	1	0	1	0	1	1	1	1	0	1	1	1	1	0	1	1	1	1	1	1	1	0	0	0	0	0	0	1	1	0	0
oqxA	1	0	0	0	1	0	0	0	0	0	0	0	0	0	0	0	0	0	0	0	0	1	0	0	1	1	0	1	0	0	0	0	0	0	0	0	0	0	0	0	0	0	0	0
oqxA2	0	0	0	1	0	1	0	0	0	0	0	1	0	0	0	0	0	0	0	0	0	0	0	0	0	0	0	0	0	1	0	1	0	1	0	0	0	0	0	0	1	0	0	0
oqxB	1	0	0	1	1	0	0	0	0	0	0	1	0	0	0	0	0	0	0	0	0	1	0	0	1	1	0	1	0	1	0	0	0	0	0	0	0	0	0	0	0	0	0	0
oqxB2	0	0	0	0	0	1	0	0	0	0	0	0	0	0	0	0	0	0	0	0	0	0	0	0	0	0	0	0	0	0	0	1	0	1	0	0	0	0	0	0	1	0	0	0
qepA1	0	0	0	0	0	0	0	0	0	0	1	0	0	0	0	0	0	0	0	0	0	0	0	0	0	0	0	0	0	0	0	0	0	0	0	0	0	0	0	0	0	0	0	0
qnrA1	0	0	0	0	0	0	0	0	0	0	0	0	0	0	0	0	0	0	0	0	0	0	0	0	0	0	0	0	0	0	0	0	0	0	0	0	0	0	0	0	0	0	0	1
qnrS1	0	0	0	0	0	0	0	0	0	0	0	0	1	0	0	0	1	0	0	0	0	0	0	0	0	0	1	0	0	0	0	0	0	0	0	0	1	0	0	0	0	1	0	0
rmtB1	0	0	0	0	0	0	0	0	0	0	1	0	0	0	0	1	0	0	1	0	1	0	0	0	1	1	0	1	1	0	1	0	1	0	0	0	0	0	0	0	1	0	0	0
sat2_gen	0	0	0	0	0	0	0	0	0	0	0	0	0	0	0	0	0	0	0	0	0	0	0	1	0	0	0	0	0	1	0	0	0	0	1	0	0	0	0	0	0	0	0	0
sul1	0	0	0	0	0	1	1	0	1	0	1	1	0	1	1	0	0	1	0	1	0	0	1	1	1	1	1	1	1	1	1	1	1	1	1	1	0	0	0	1	1	1	0	1
sul2	1	1	1	1	1	1	1	0	1	0	1	1	1	1	1	1	1	1	1	0	1	1	1	0	0	0	1	1	1	1	0	1	1	1	1	1	1	0	1	1	1	0	1	0
sul3	0	0	0	1	0	1	1	0	0	0	0	1	0	0	1	1	0	0	0	0	0	1	0	0	0	0	0	0	0	0	0	1	0	1	0	1	0	1	1	0	1	1	1	0
tet(A)	1	1	1	0	1	1	1	0	1	0	1	1	1	1	1	1	1	1	1	1	1	1	1	0	1	1	1	1	1	1	1	1	1	1	0	1	1	1	1	1	0	1	1	0
tet(B)	0	0	0	0	0	0	0	0	0	0	0	0	0	0	0	0	0	0	0	0	0	0	0	0	0	0	0	0	0	0	0	0	0	0	1	0	0	0	0	0	1	0	0	0
tet(M)	0	0	0	0	0	0	0	0	0	0	0	1	1	0	0	0	0	1	1	0	0	1	0	0	0	0	0	0	0	0	0	0	0	0	0	0	0	0	1	0	0	0	0	0
